# Supplementary material for: Radiopharmacological evaluation of a caspase-3 responsive probe with optimized pharmacokinetics for PET imaging of tumor apoptosis
Source: Royal Society of Chemistry journal article supplement (doi:10.1039/d0ob00690d), 2020-01-01
Supplement: d0ob00690d1.pdf [file d0ob00690d1.pdf]

## *Electronic supplementary information*

### **Radiopharmacological evaluation of caspase-3 responsive probe with optimized pharmacokinetics for PET imaging of tumor apoptosis**

Shijie Wang<sup>a,b,#</sup>, Dingyao Gao<sup>a,b,#</sup>, Ke Li<sup>b</sup>, Siqin Ye<sup>b</sup>, Qingzhu Liu<sup>b</sup>, Ying Peng<sup>b</sup>, Gaochao Lv<sup>b</sup>, Ling Qiu<sup>a,b,\*</sup> and Jianguo Lin<sup>b,c,\*</sup>

<sup>a</sup>School of Chemical and Material Engineering, Jiangnan University, Wuxi 214122, China

<sup>b</sup>NHC Key Laboratory of Nuclear Medicine, Jiangsu Key Laboratory of Molecular Nuclear Medicine, Jiangsu Institute of Nuclear Medicine, Wuxi 214063, PR China

<sup>c</sup>Department of Radiopharmaceuticals, School of Pharmacy, Nanjing Medical University, Nanjing 211166, China

<sup>#</sup>These authors contributed equally to this work.

Corresponding Authors, \*Email: [linjianguo@jsinm.org](mailto:linjianguo@jsinm.org) (J. Lin) or [qiuling@jsinm.org](mailto:qiuling@jsinm.org) (L. Qiu)

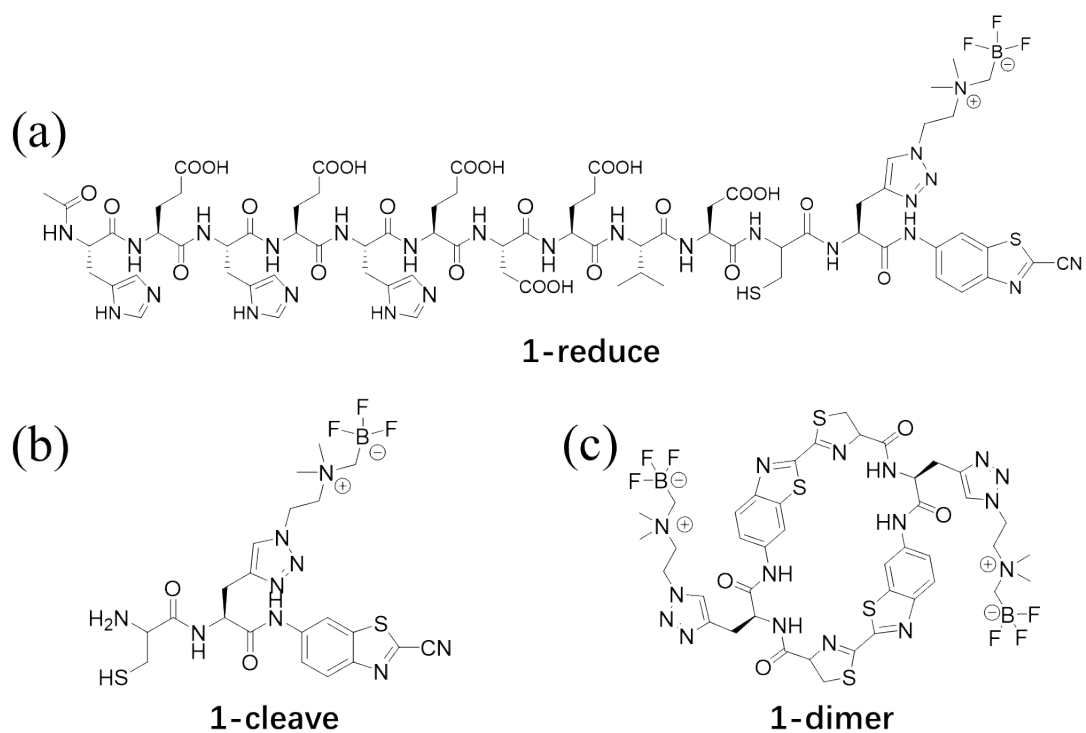

**Figure S1.** The structures of **1-cleave** (a), **1-cleave** (b) and **1-dimer** (c).

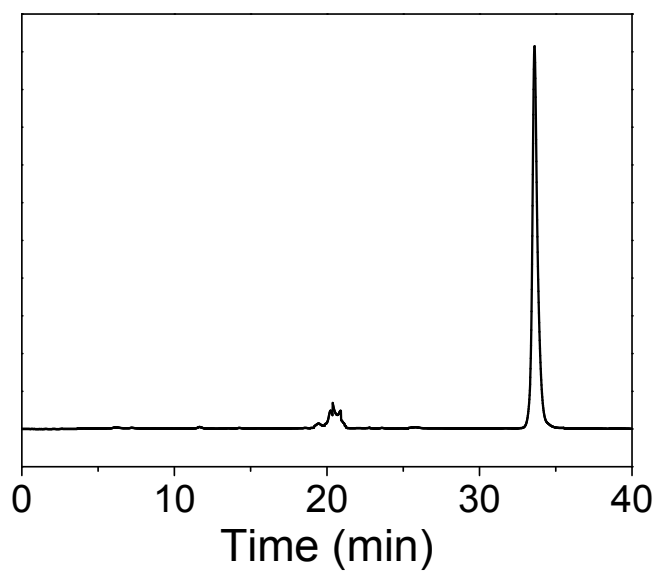

**Figure S2.** HPLC trace of purified Ac-HEHEHEDEV D-OH.

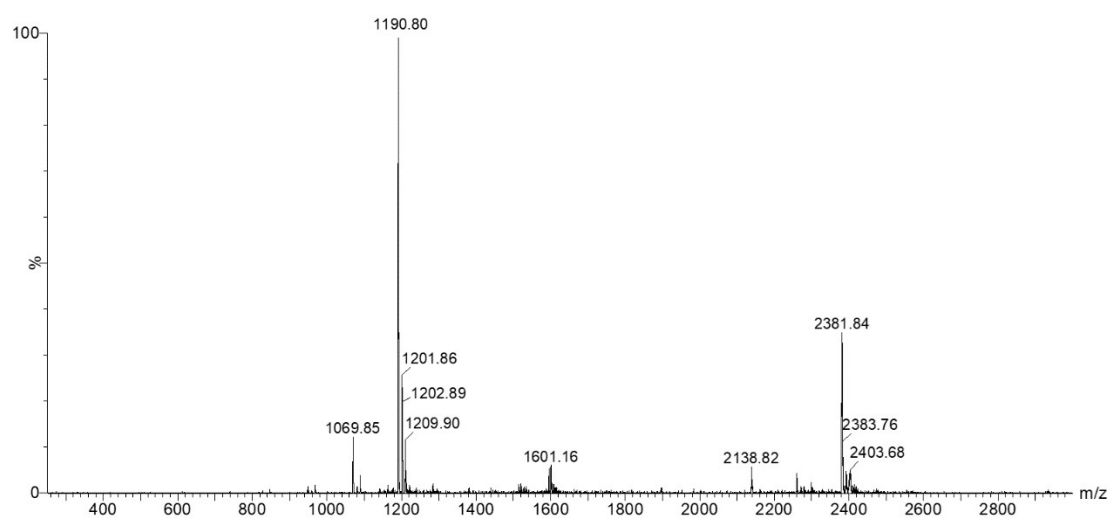

**Figure S3.** ESI-MS of Ac-HEHEHEDEV D-OH.

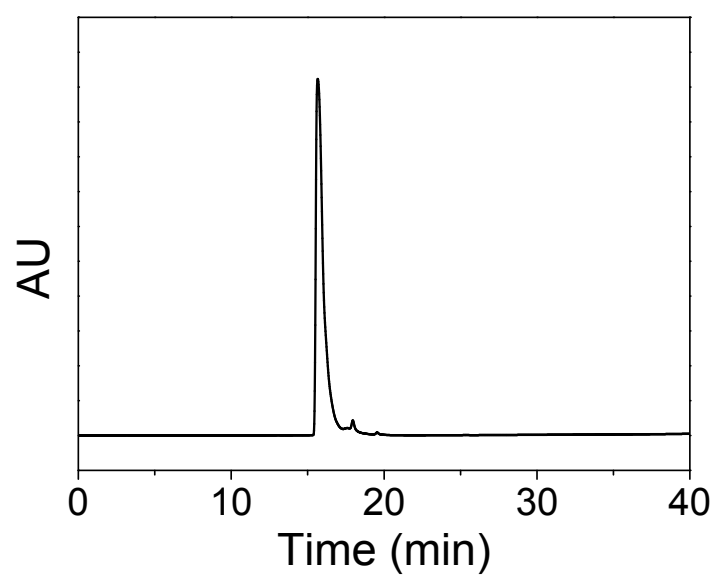

**Figure S4.** HPLC trace of purified compound A.

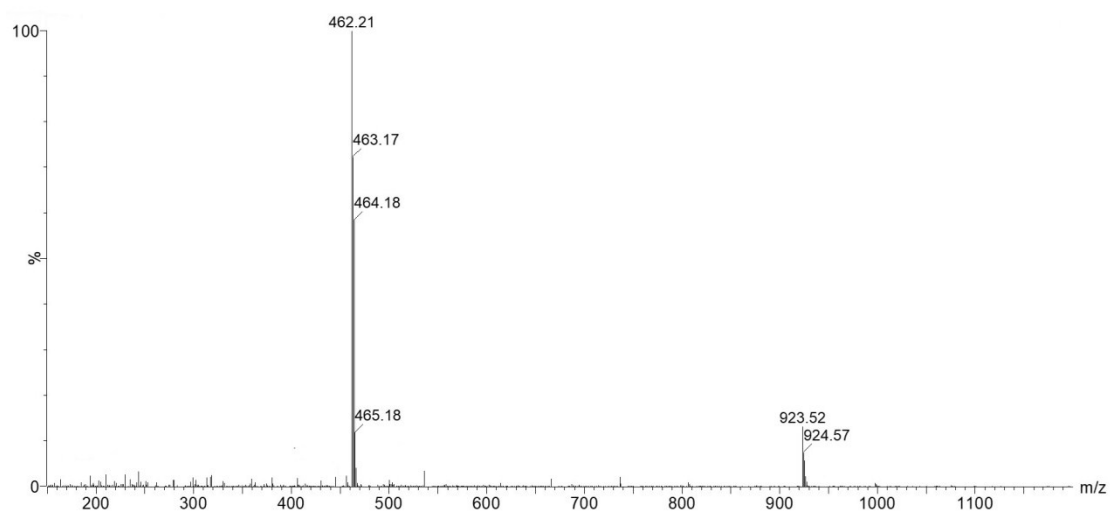

**Figure S5.** ESI-MS of compound A.

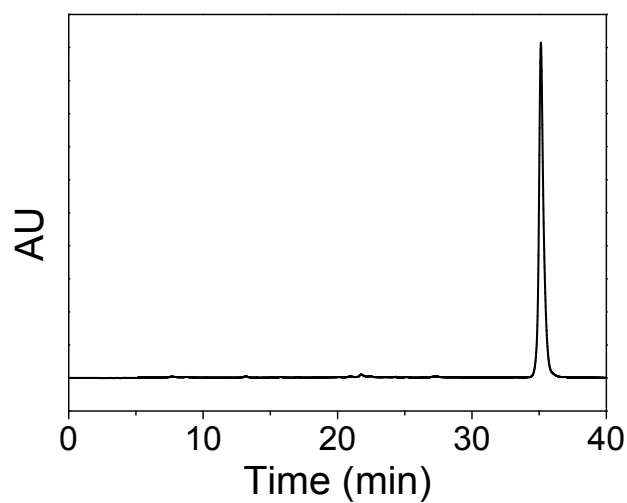

**Figure S6.** HPLC trace of purified compound B.

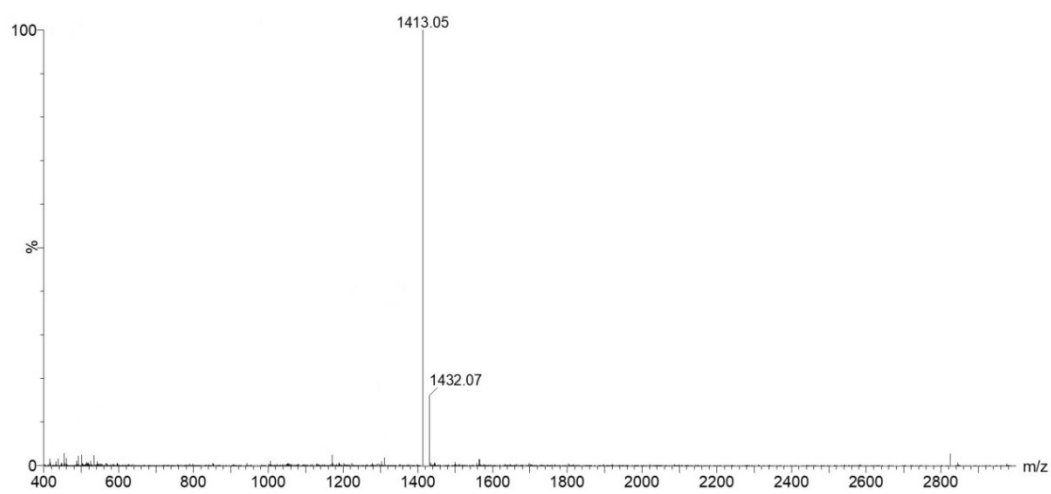

**Figure S7.** ESI-MS of compound B.

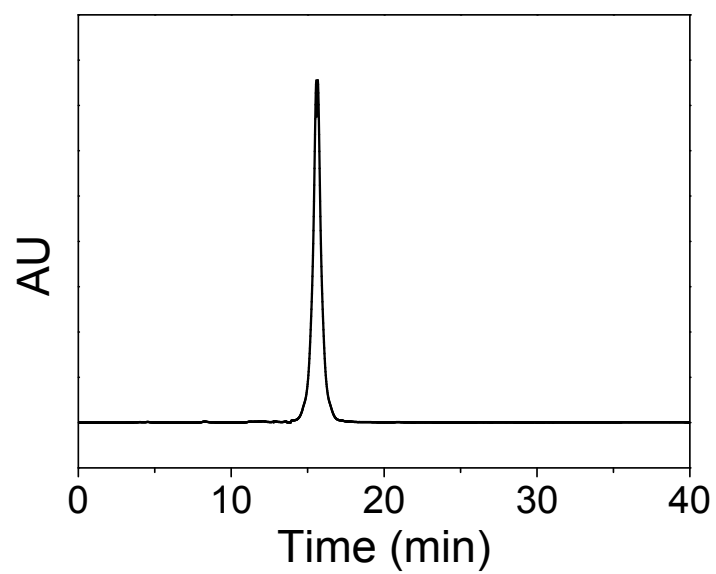

**Figure S8.** HPLC trace of purified compound **C**.

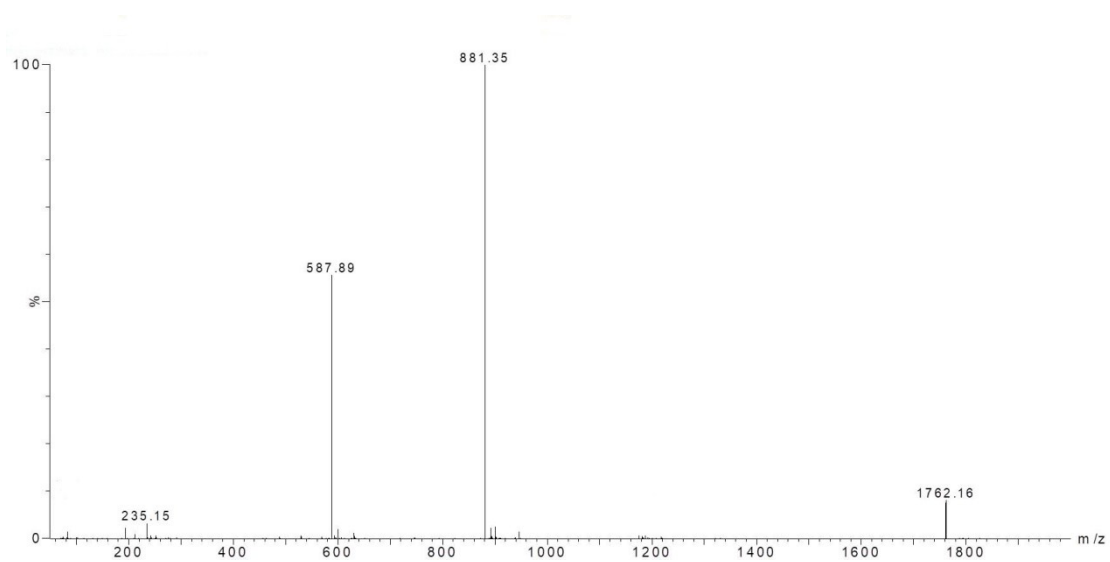

**Figure S9.** ESI-MS of compound **C**.

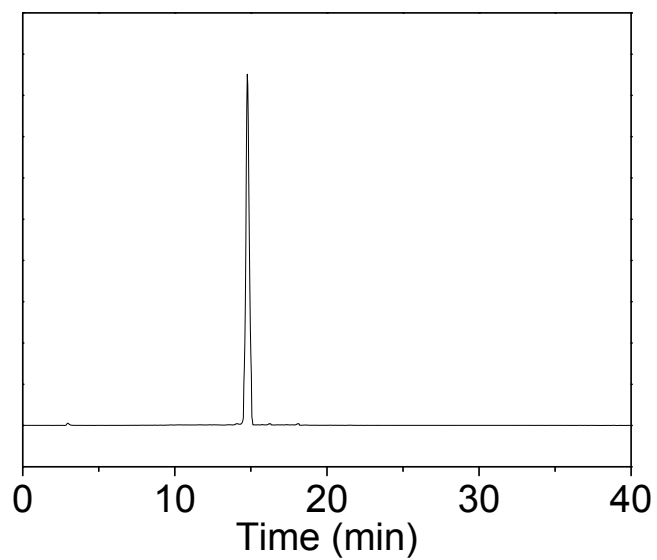

**Figure S10.** HPLC trace of purified probe 1.

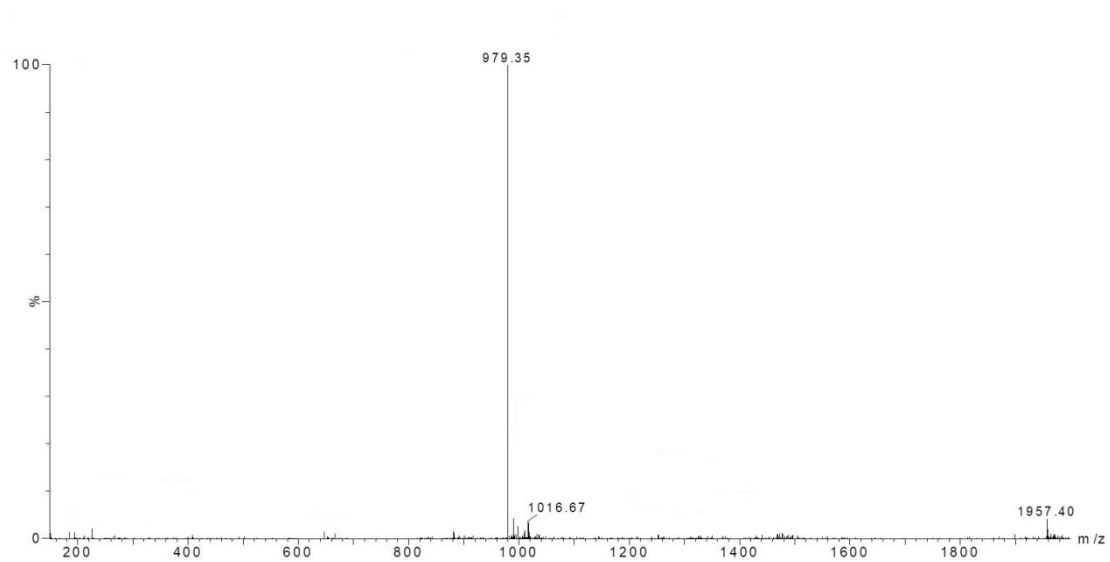

**Figure S11.** ESI-MS of probe 1.

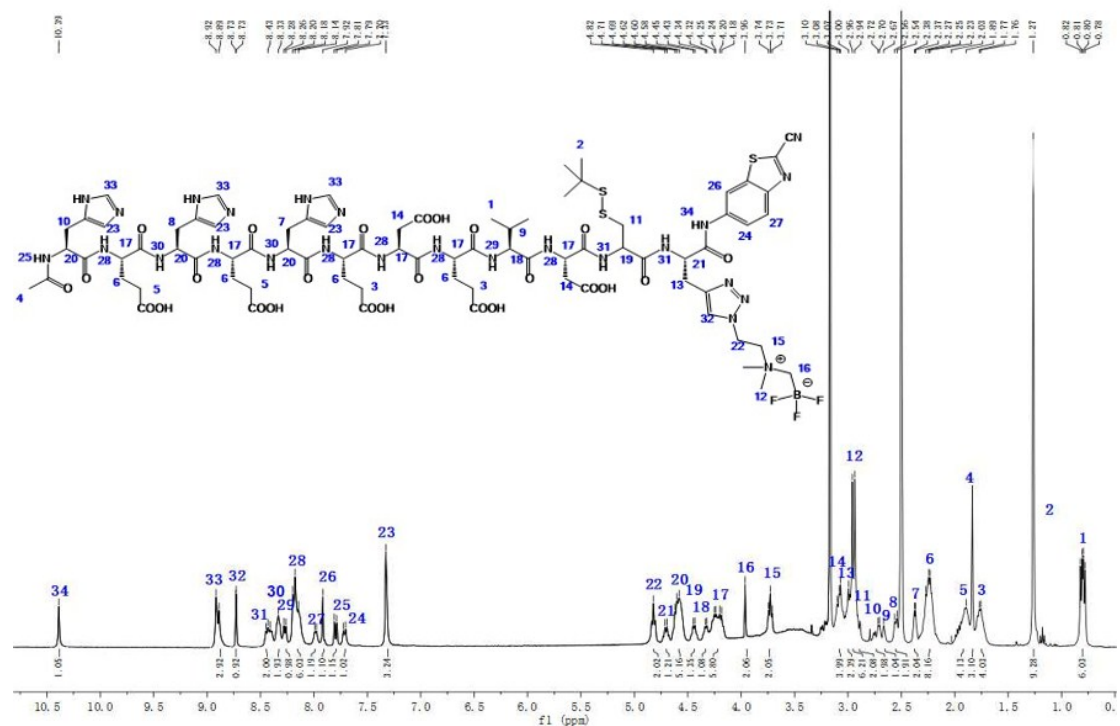

Figure S12.  $^1\text{H}$  NMR spectrum of probe 1.

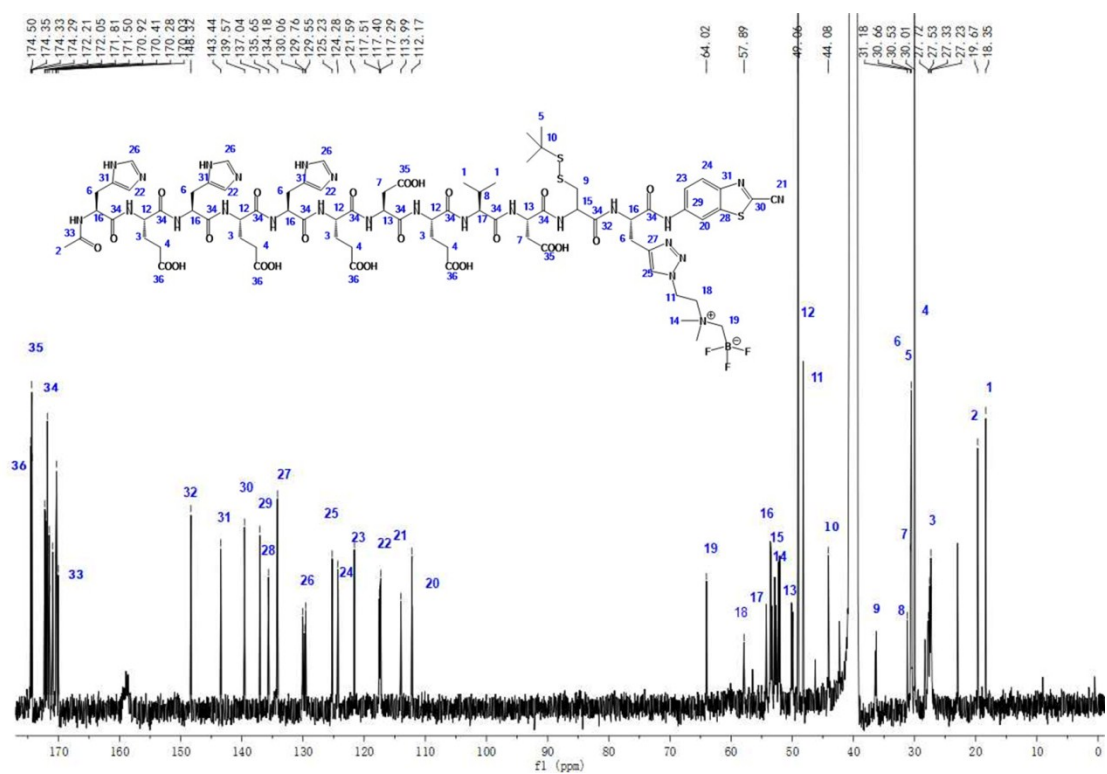

Figure S13.  $^{13}\text{C}$  NMR spectrum of probe 1.

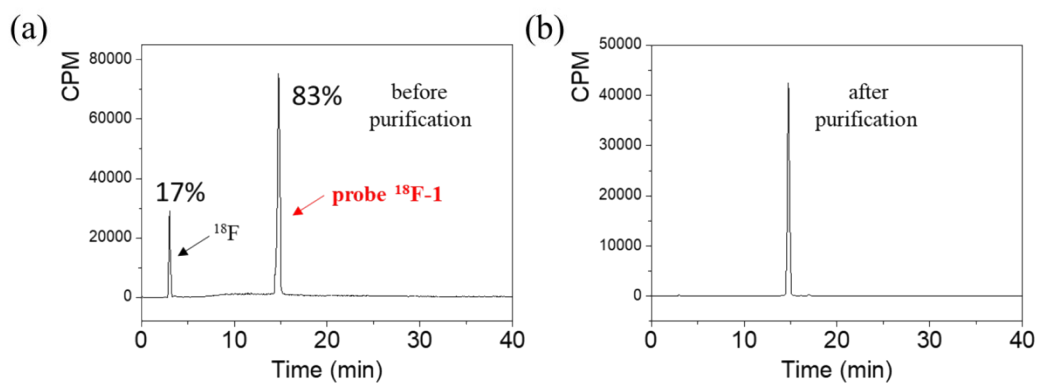

**Figure S14.** Radioactivity HPLC trace of  $^{18}\text{F}$ -1 before (a) and after purification (b).

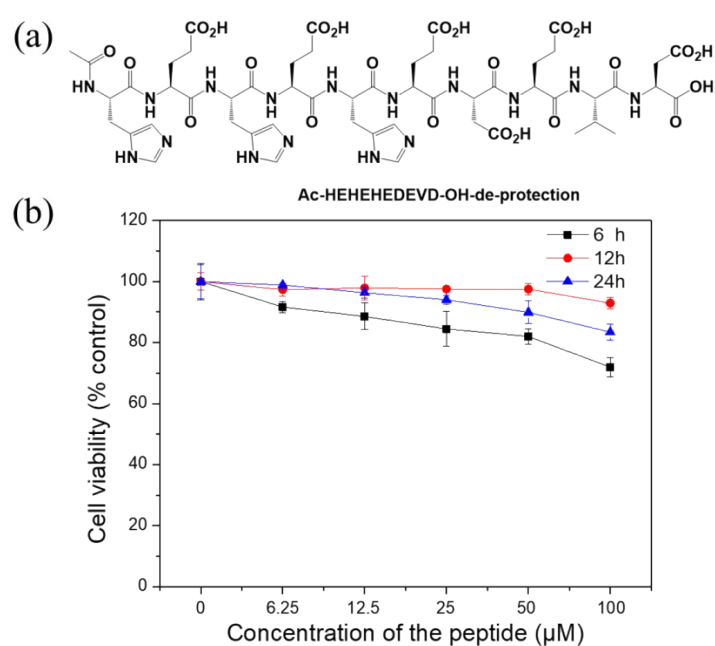

**Figure S15.** (a) The structure of the peptide **Ac-HEHEHE-OH-de-protection**. (b) The toxicity of the peptide **Ac-HEHEHE-OH-de-protection** against A549 cells at different concentrations.



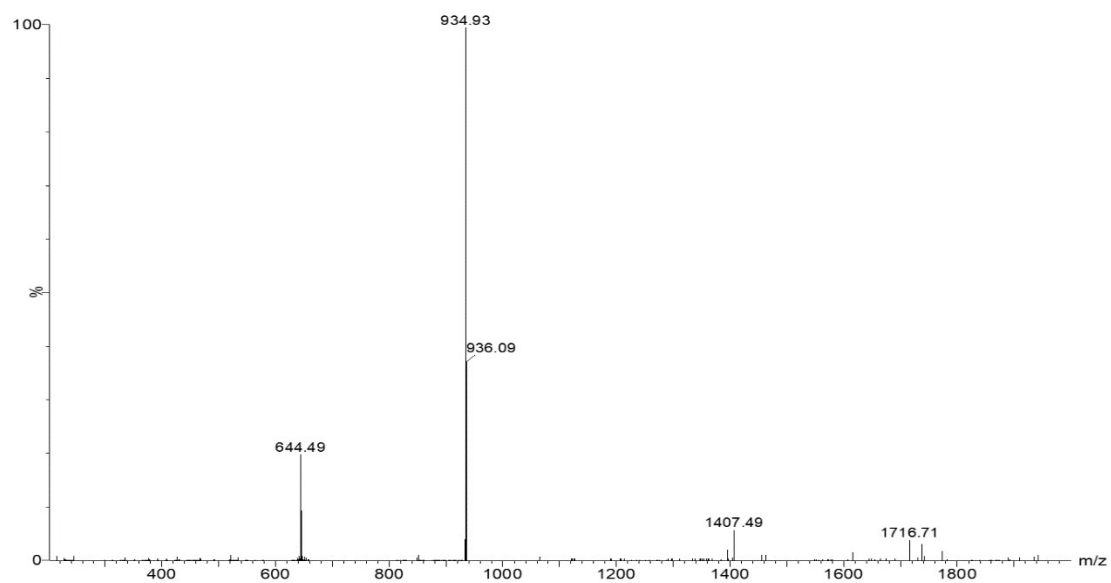

**Figure S16. ESI-MS of 1-reduce.**

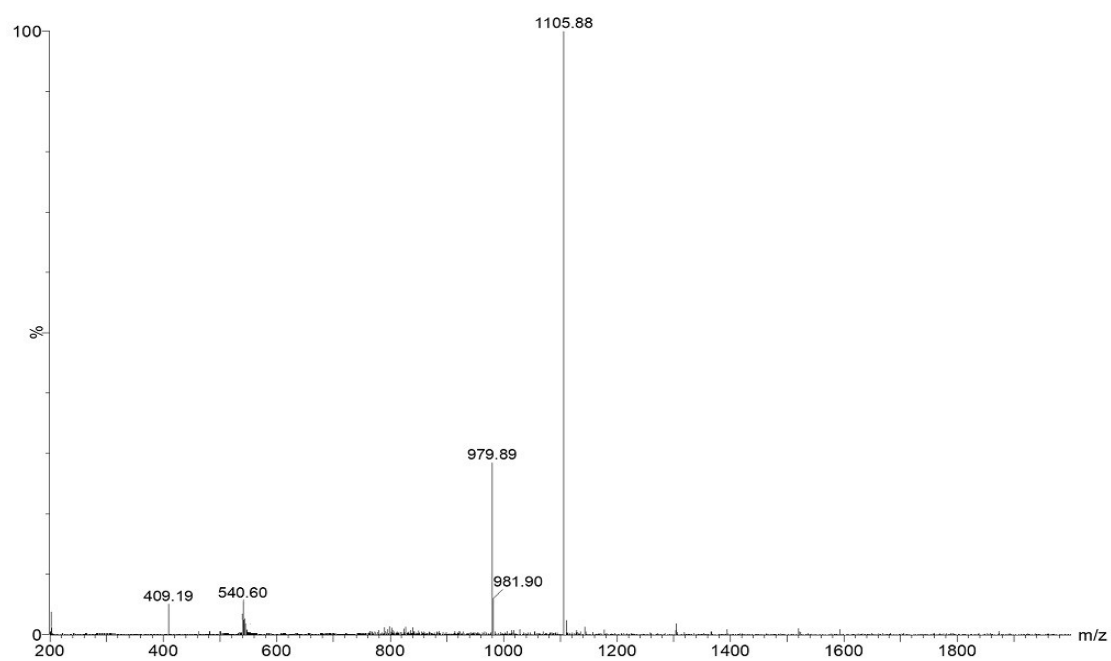

**Figure S17. ESI-MS of 1-dimer.**

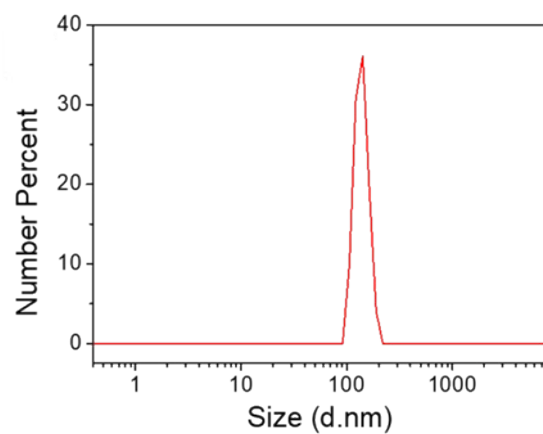

**Figure S18.** The size distribution of the particles formed in macrocyclization assay.

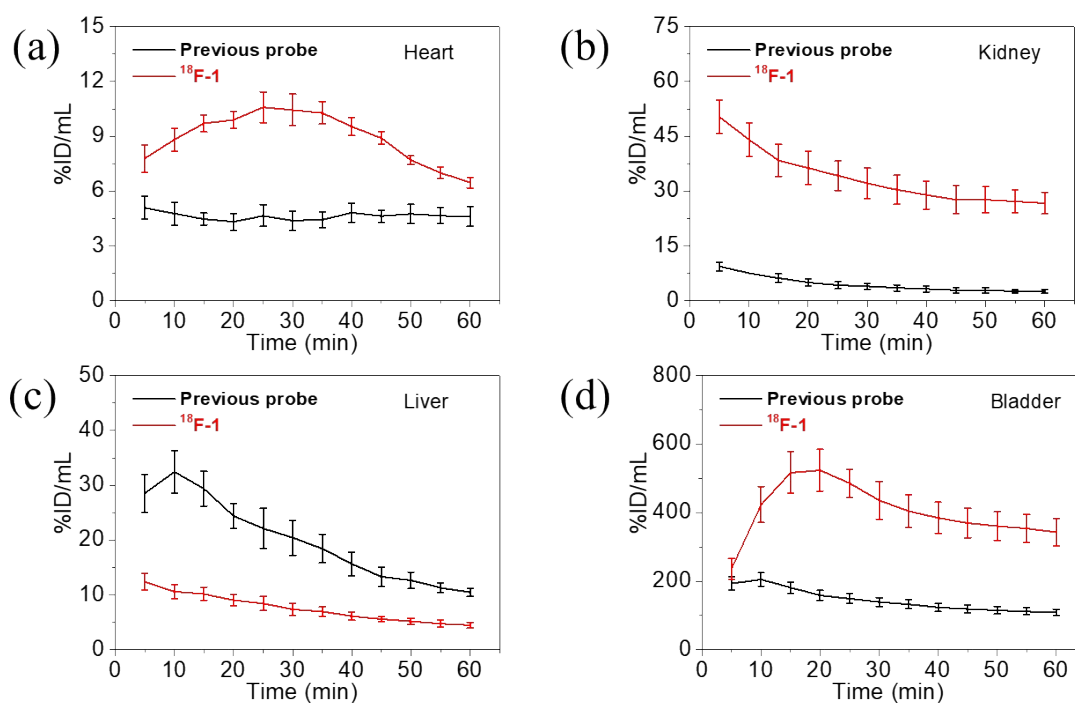

**Figure S19.** Heart (a), kidney (b), liver (c) and bladder (d) uptake curves of the mice injected with previous probe or  $^{18}\text{F-1}$ .

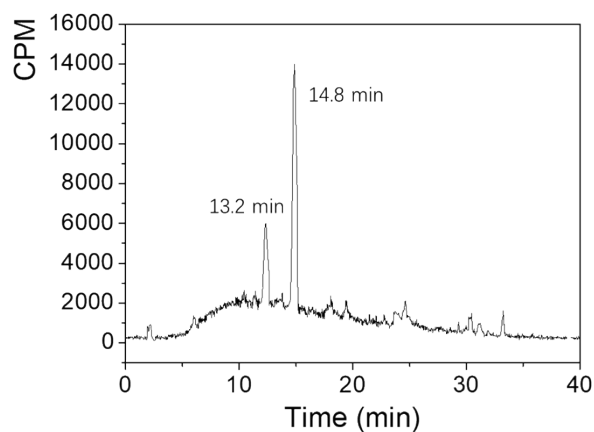

**Figure S20.** The radioactivity HPLC trace of the liver homogenate.

**Table S1.** The analytical HPLC condition for the all compounds (Method A).

| Time (min) | Flow (mL/min) | (H <sub>2</sub> O + 0.1 %TFA)% | (CH <sub>3</sub> CN + 0.1 %TFA)% |
|------------|---------------|--------------------------------|----------------------------------|
| 0          | 1.0           | 80                             | 20                               |
| 3          | 1.0           | 80                             | 20                               |
| 35         | 1.0           | 10                             | 90                               |
| 40         | 1.0           | 80                             | 20                               |

**Table S2.** The HPLC condition for purification the compound **A** and probe **1** (Method B).

| Time (min) | Flow (mL/min) | (H <sub>2</sub> O + 0.1 %TFA)% | (CH <sub>3</sub> CN + 0.1 %TFA)% |
|------------|---------------|--------------------------------|----------------------------------|
| 0          | 3.0           | 80                             | 20                               |
| 3          | 3.0           | 80                             | 20                               |
| 5          | 3.0           | 70                             | 30                               |
| 30         | 3.0           | 50                             | 50                               |
| 35         | 3.0           | 10                             | 90                               |
| 40         | 3.0           | 80                             | 20                               |
